# Supplementary material for: Fracture development characteristics in carbonate reservoirs: insights from stress field simulation with a heterogeneous rock mechanics model and adaptive boundaries
Source: Research Square preprint supplement (doi:10.21203/rs.3.rs-8500081/v1), 2026-01-30
Supplement: Supplementary file 1 [file adb9bf6864ca7c5ec8d11ab4.docx]

**Table S1.** The Rock mechanical parameters of the Ordovician strata in Tahe area.

| **Samples** | **Depth (m)** | **Lithology** | **E (GPa)** | **μ (GPa)** | **Data Sources** |
| --- | --- | --- | --- | --- | --- |
| FS-V1 | 5048.2–5050.2 | carbonate | 38.24 | 0.204 | Cao, 2019 |
| FS-V3 | 37.66 | 0.207 | Cao, 2019 |
| FS-V4 | 38.27 | 0.192 | Cao, 2019 |
| FS-V16 | 38.19 | 0.200 | Cao, 2019 |
| FS-V17 | 37.36 | 0.201 | Cao, 2019 |
| X1201 | 6509.42 | limestone | 50.01 | 0.291 | Liu et al., 2020 |
| X1215 | 6240.00 | limestone | 67.44 | 0.266 | Liu et al., 2020 |
| X1225 | 6500.00 | limestone | 66.63 | 0.232 | Liu et al., 2020 |
| X1271 | 6400.00 | limestone | 59.13 | 0.274 | Liu et al., 2020 |
| X23 | 6264.71 | limestone | 66.63 | 0.263 | Liu et al., 2020 |
| X1213 | 6260.00 | limestone | 67.18 | 0.295 | Liu et al., 2020 |
| X1204 | 5976.48 | limestone | 69.25 | 0.251 | Liu et al., 2020 |
| X1240 | 5650.00 | limestone | 86.95 | 0.262 | Liu et al., 2020 |
| X1217 | 6000.0 | limestone | 75.57 | 0.246 | Liu et al., 2020 |
| S1 | 6194.0 | limestone | 33.98 | 0.138 | Wang, 2020 |
| S2 | 6343.0 | limestone | 39.52 | 0.23 | Wang, 2020 |
| S3 | 6545.0 | limestone | 35.58 | 0.167 | Wang, 2020 |
| S4 | 6659.0 | limestone | 65.29 | 0.288 | Wang, 2020 |
| S5 | 6848.0 | limestone | 52.79 | 0.28 | Wang, 2020 |
